# Supplementary material for: Spray-coated epoxy barrier films containing high aspect ratio functionalized graphene nanosheets
Source: Royal Society of Chemistry journal article supplement (doi:10.1039/c5ra15363h), 2015-01-01
Supplement: c5ra15363h1.pdf [file c5ra15363h1.pdf]

Spray-Coated Epoxy Barrier Films Containing High Aspect Ratio Functionalized Graphene  
Nanosheets

Peng Li<sup>1</sup>, Tsao-Cheng Huang<sup>1</sup>, Kevin L. White<sup>1</sup>, Spencer Hawkins<sup>1</sup>, Masaya Kotaki<sup>2</sup>, Riichi  
Nishimura<sup>3</sup>, and Hung-Jue Sue<sup>1\*</sup>

<sup>1</sup> Department of Materials Science and Engineering, Texas A&M University, College Station, TX 77843, United States.

<sup>2</sup> Material Research Center, Kaneka Americas Holding, Inc., College Station, TX 77843

<sup>3</sup> Frontier Materials Development Laboratories, Kaneka Corporation, Osaka 530-8288, Japan

\*E-mail: hjsue@tamu.edu (H.-J. Sue).

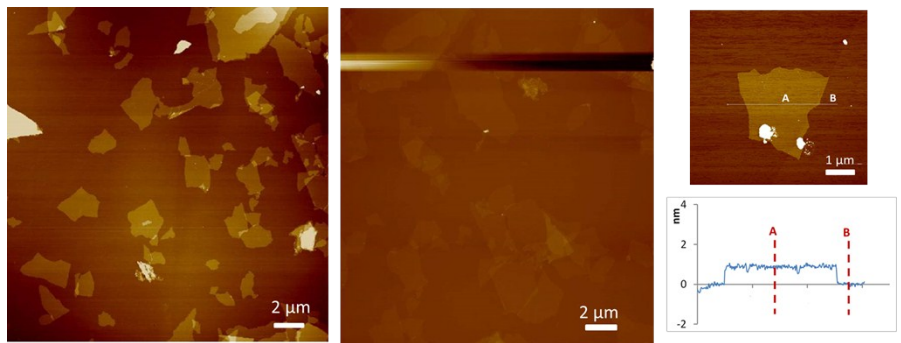

Supplemental Figure S1. Tapping-mode AFM image and height profile of MG.

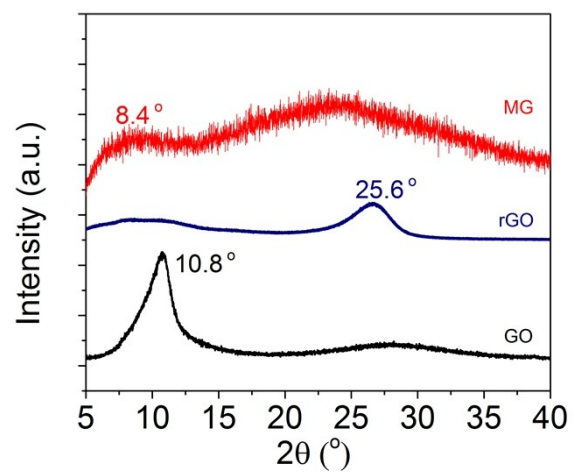

Supplemental Figure S2. XRD of graphene oxide (GO), reduced graphene oxide (rGO) and modified graphene (MG).

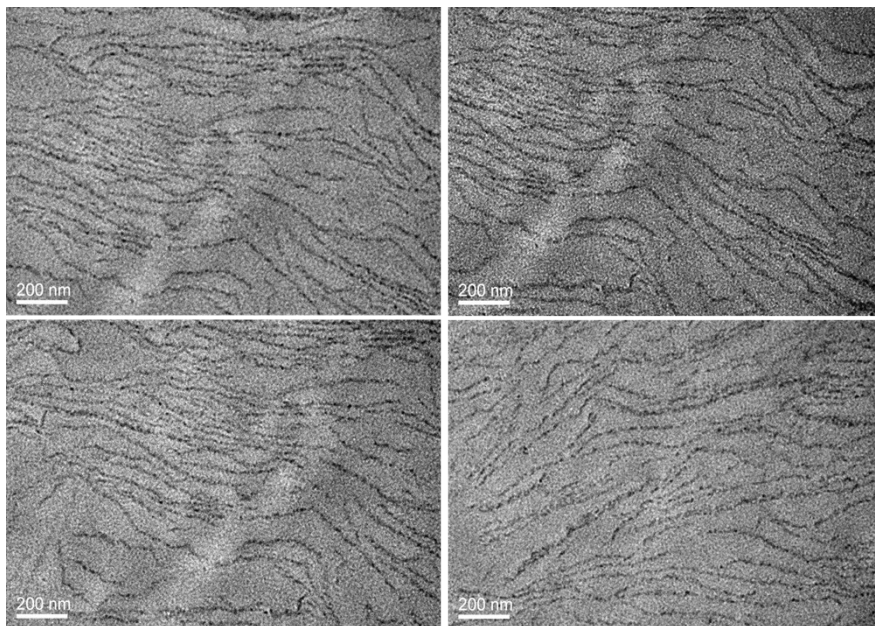

Supplemental Figure S3. TEM of cross-sectional epoxy/MG films (3.6 vol%) at different regions.

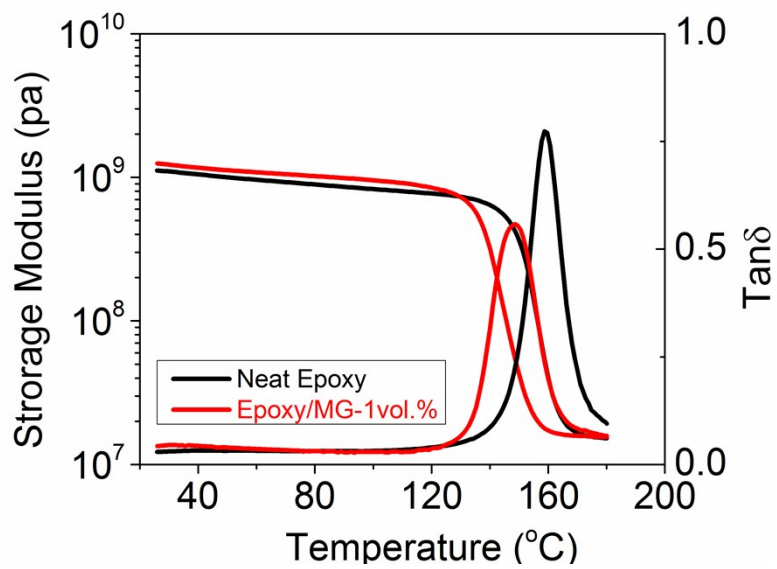

Supplemental Figure S4. DMA of neat epoxy and epoxy/MG (1vol.%) bulk samples.

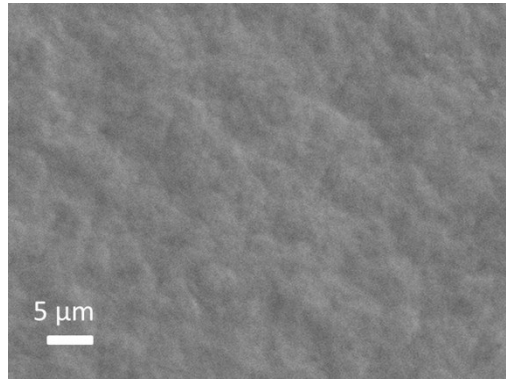

Supplemental Figure S5. SEM of epoxy/MG (3.6 vol%) film surface

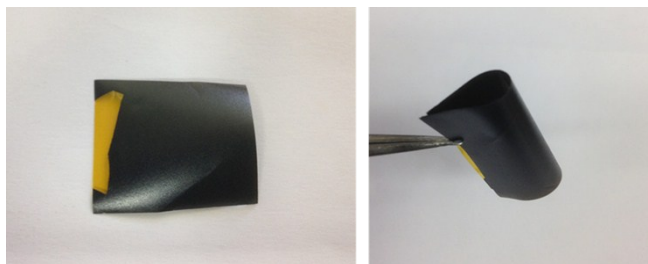

Supplemental Figure S6. Photograph of epoxy/MG (7.5 vol%) film on PI substrate.

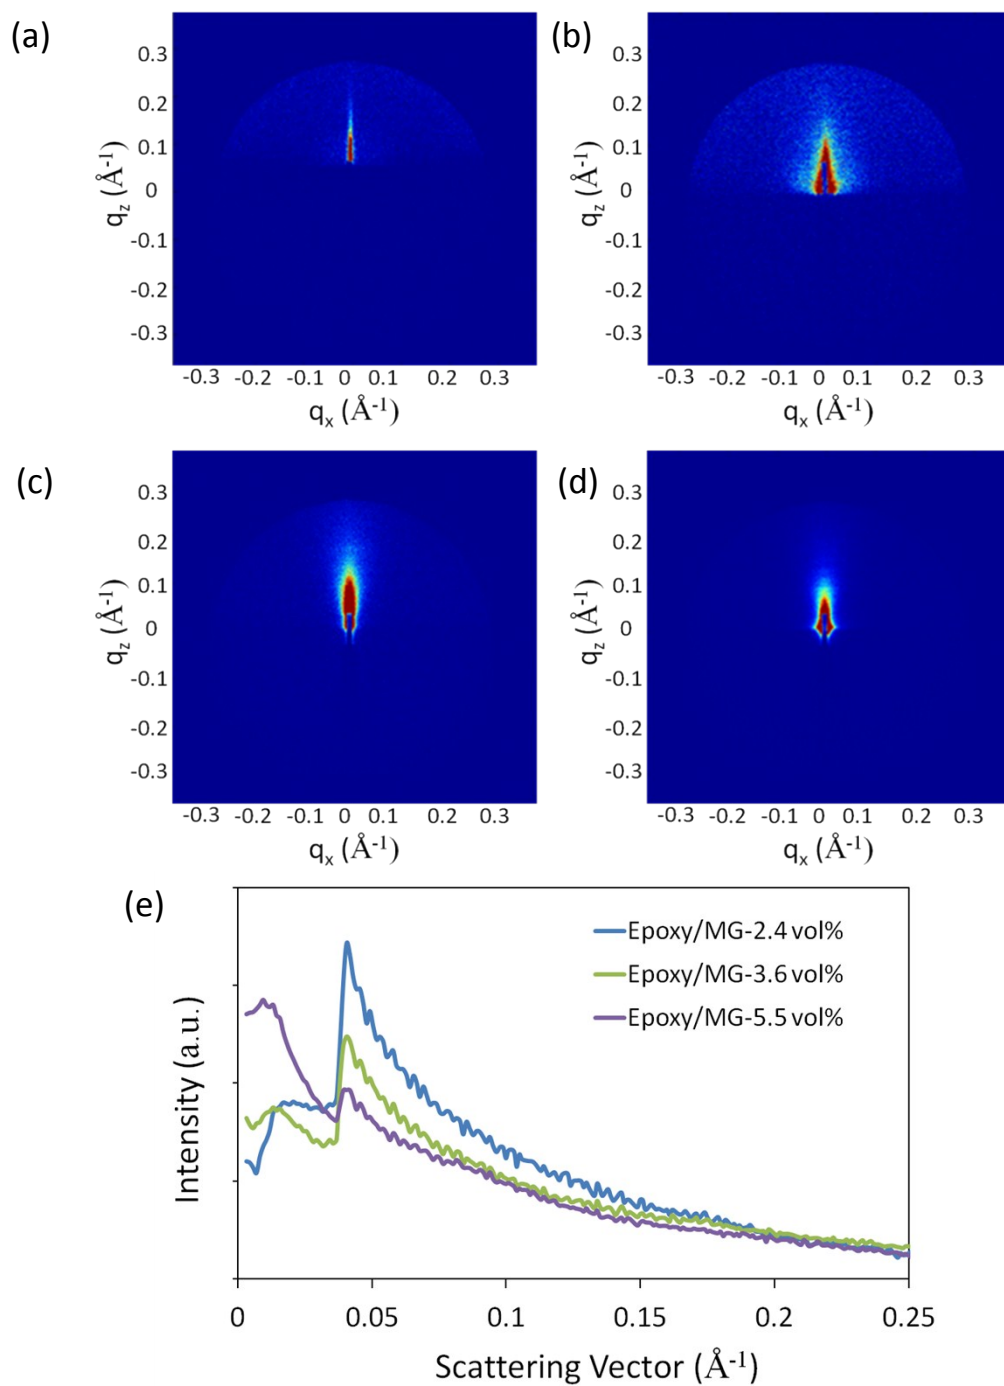

Supplemental Figure S7. GISAXS 2D diffractograms of epoxy/MG nanocomposite films at (a) 0.6 vol.%, (b) 2.4 vol.%, (c) 3.6 vol.%, and (d) 5.5 vol.% ZrP. (e) GISAXS 1D diffractogram spectrum of epoxy/MG films at various concentrations.



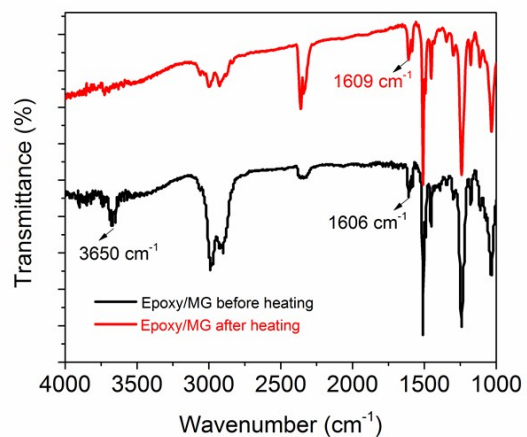

Supplemental Figure S8. FTIR of epoxy/MG before and after heating at 180 °C for 4hrs. The C=O stretch is observed at 1606 cm<sup>-1</sup> in the -COOH group on MG surface, and it shifts to 1609 cm<sup>-1</sup> in the ester group formed by reaction with epoxy.

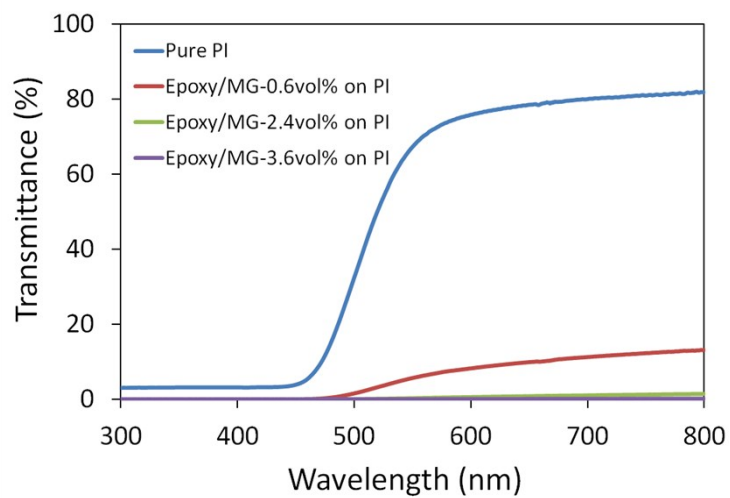

Supplemental Figure S9. Transmittance spectra of epoxy/MG films at various MG concentrations, illustrating a decreased transparency with increased MG loadings.

**Supplemental Table S1** List of permeability models for polymer nanocomposites.

| Model                                    | Flake Size, Array Type                                                                                           | Model Dimension | Equation                                                                           |
|------------------------------------------|------------------------------------------------------------------------------------------------------------------|-----------------|------------------------------------------------------------------------------------|
| Nielsen                                  | Monodisperse, Regular Array<br>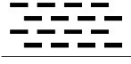 | 2D              | $\frac{P}{P_0} = \frac{1 - \phi}{1 + \frac{\alpha}{2}\phi}$                        |
| Cussler Random Array Monodisperse Flakes | Monodisperse, Random Array<br>  | 2D              | $\frac{P}{P_0} = \frac{1 - \phi}{[1 + \frac{\alpha}{3}\phi]^2}$                    |
| Cussler Ideal Regular Array              | Monodisperse, Regular Array<br> | 2D              | $\frac{P}{P_0} = \left(1 + \frac{\frac{1}{4}\alpha^2\phi^2}{1 - \phi}\right)^{-1}$ |
| Gusev-Lusti                              | Polydisperse, Random Array<br>  | 3D              | $\frac{P}{P_0} = e^{-\left(\frac{\alpha\phi}{3.47}\right)^{0.71}}$                 |
| Bharadwaj                                | Random, non-oriented<br>        | 2D              | $\frac{P}{P_0} = \frac{1 - \phi}{[1 + \alpha\phi(2S + 1)/6]}$                      |

Note: The Nielsen, Cussler and Bharadwaj models can be viewed as 3D models if the fillers are considered to be ribbons with infinite length. The order parameter  $S = -1/2$ , when the ribbons are normal to the membrane;  $S = 1$ , when the ribbons are parallel to the membrane surface;  $S = 0$ , when the ribbons are randomly oriented.
